# Supplementary material
Source: publisher figshare collection journal article supplement (https://acs.figshare.com/ndownloader/files/34388509)
Supplement: Supplementary file 1 [file 34388509]

compound	smiles
HAP1	O=C(C1=C(C)NC(C2=CC=CC=N2)=N[C@H]1C(C(Cl)=C3)=CC=C3F)OC
HAP4	O=C(C1=C(C2=CC=CC=C2)NC(C3=CC=CC=N3)=N[C@H]1C(C(Cl)=C4)=CC=C4F)OC
HAP7	O=C(C1=C(NC(C2=CC=CC=N2)=N[C@H]1C(C(Cl)=C3)=CC=C3F)CNCC45C[C@@H](C6)CC(C5)CC6C4)OC
HAP12	O=C(C1=C(NC(C2=CC=CC=N2)=N[C@H]1C(C(Cl)=C3)=CC=C3F)CN4CCOCC4)OC
BAY41-4109	O=C(C1=C(C)NC(C2=C(F)C=C(F)C=N2)=N[C@H]1C(C(Cl)=C3)=CC=C3F)OC
GLS4	O=C(C1=C(NC(C2=NC=CS2)=N[C@H]1C(C(Br)=C3)=CC=C3F)CN4CCOCC4)OCC
AT130	O=C(C1=CC=C(N(=O)=O)C=C1)N/C(C(N2CCCCC2)=O)=C(C3=C(OC)C=CC=C3)/Br
AT61	O=C(C1=CC=CC=C1)N/C(C(N2CCCCC2)=O)=C(C3=CC=CC=C3)/Cl
SBA_R01	FC1=C(F)C(F)=CC(NC(C2=CC=C(F)C(S(N3CCC(O)CC3)(=O)=O)=C2)=O)=C1
DRV01	O=C(C1=CC=C(Cl)C(S(N2CCCCCC2)(=O)=O)=C1)NCC3=CC=CC=C3
DRV23	FC1=C(F)C=CC(NC(C2=C(F)C=CC(S(NC(C)CC)(=O)=O)=C2)=O)=C1
GLP-17A	FC1=CC=C(NC(C2=C(C)C(C(C(NC3=CC=CC=N3)=O)=O)=C(C)N2C)=O)C=C1F
GLP-17C	FC1=CC=C(NC(C2=C(C)C(C(C(N(C)CC)=O)=O)=C(C)N2C)=O)C=C1F
Comp2	FC1=CC=C(N(C)C(C2=C(C)C(C(C(NCC#C)=O)=O)=C(C)N2C)=O)C=C1F
GLP-26	FC1=CC=C(NC(C2=C(C)C(C(C(NCC#C)=O)=O)=C(C)N2C)=O)C=C1F
